# Supplementary material
Source: PubMed Central journal article supplement (PMC5573089)
Supplement: supp_WNL.0000000000003208_Supplemental_Figure_References.pdf [file supp_WNL.0000000000003208_Supplemental_Figure_References.pdf]

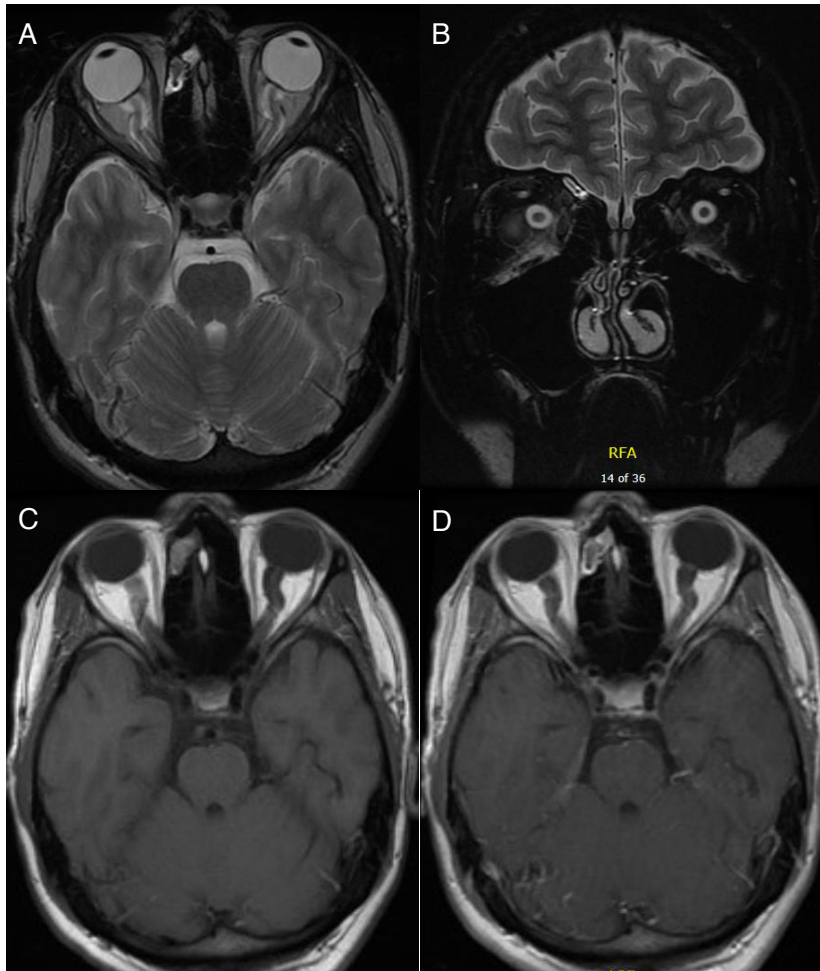

**Figure e-1: A-B.** Axial and coronal T2 MRI images showing optic nerve sheath expansion, mild protrusion of the optic papilla, and flattening of the posterior aspects of the globes, suggestive of elevated intracranial pressure. **C-D.** Pre- and post-contrast axial T1 MRI images at the level of globes and cavernous sinus did not reveal any structural abnormalities or pathological enhancement.

## Supplemental references:

- e-1 Attia J, Hatala R, Cook DJ, Wong JG. The rational clinical examination. Does this adult patient have acute meningitis? *Jama*. 1999 Jul 14;282(2):175–181.
- e-2 Rubin RC, Henderson ES, Ommaya AK, Walker MD, Rall DP. The production of cerebrospinal fluid in man and its modification by acetazolamide. *JNeurosurg*. 1966 Oct;25(4):430–436.
- e-3 Fishman RA. *Cerebrospinal fluid in diseases of the nervous system*. 1992.
- e-4 <http://www.cdc.gov/brucellosis/clinicians/serology.html>
- e-5 <http://www.cdc.gov/lyme/stats/graphs.html>
- e-6 <http://www.cdc.gov/lyme/diagnosistesting/labtest/twostep/index.html>
- e-7 Steenhoff AP, Smith MJ, Shah SS, Coffin SE. Neuroborreliosis with progression from pseudotumor cerebri to aseptic meningitis. *Pediatr Infect Dis J*. 2006 Jan;25(1):91–92.
- e-8 Raucher HS, Kaufman DM, Goldfarb J, Jacobson RI, Roseman B, Wolff RR. Pseudotumor cerebri and Lyme disease: A new association. *The Journal of Pediatrics*. 1985 Dec;107(6):931–933.
- e-9 Kan L MD, Sood SK MD, Maytal J MD. Pseudotumor Cerebri in Lyme Disease: A Case Report and Literature Review. *Pediatr Neurol*. 1998 May;18(5):439–441.
- e-10 Härtel C, Schilling S, Neppert B, Tiemer B, Sperner J. Intracranial hypertension in neuroborreliosis. *Dev Med Child Neurol*. Cambridge University Press; 2002 Sep 1;44(09):641–642.
- e-11 Portmann A, Gueudry J, Lebas A, et al. [Isolated intracranial hypertension as the presenting sign of Lyme disease]. *J Fr Ophtalmol*. 2012 Nov;35(9):720.e1–.e4.
- e-12 Steenhoff AP, Smith MJ, Shah SS, Coffin SE. Neuroborreliosis with progression from pseudotumor cerebri to aseptic meningitis. *Pediatr Infect Dis J*. 2006 Jan;25(1):91–92.
